# Supplementary figures and images for: Enhancing employee experience and workplace well-being in oncology: a bottom-up co-construction approach in healthcare institutions in Québec
Source: Research Square preprint supplement (doi:10.21203/rs.3.rs-8683107/v1), 2026-02-04

## Supplementary material 2: Code tree


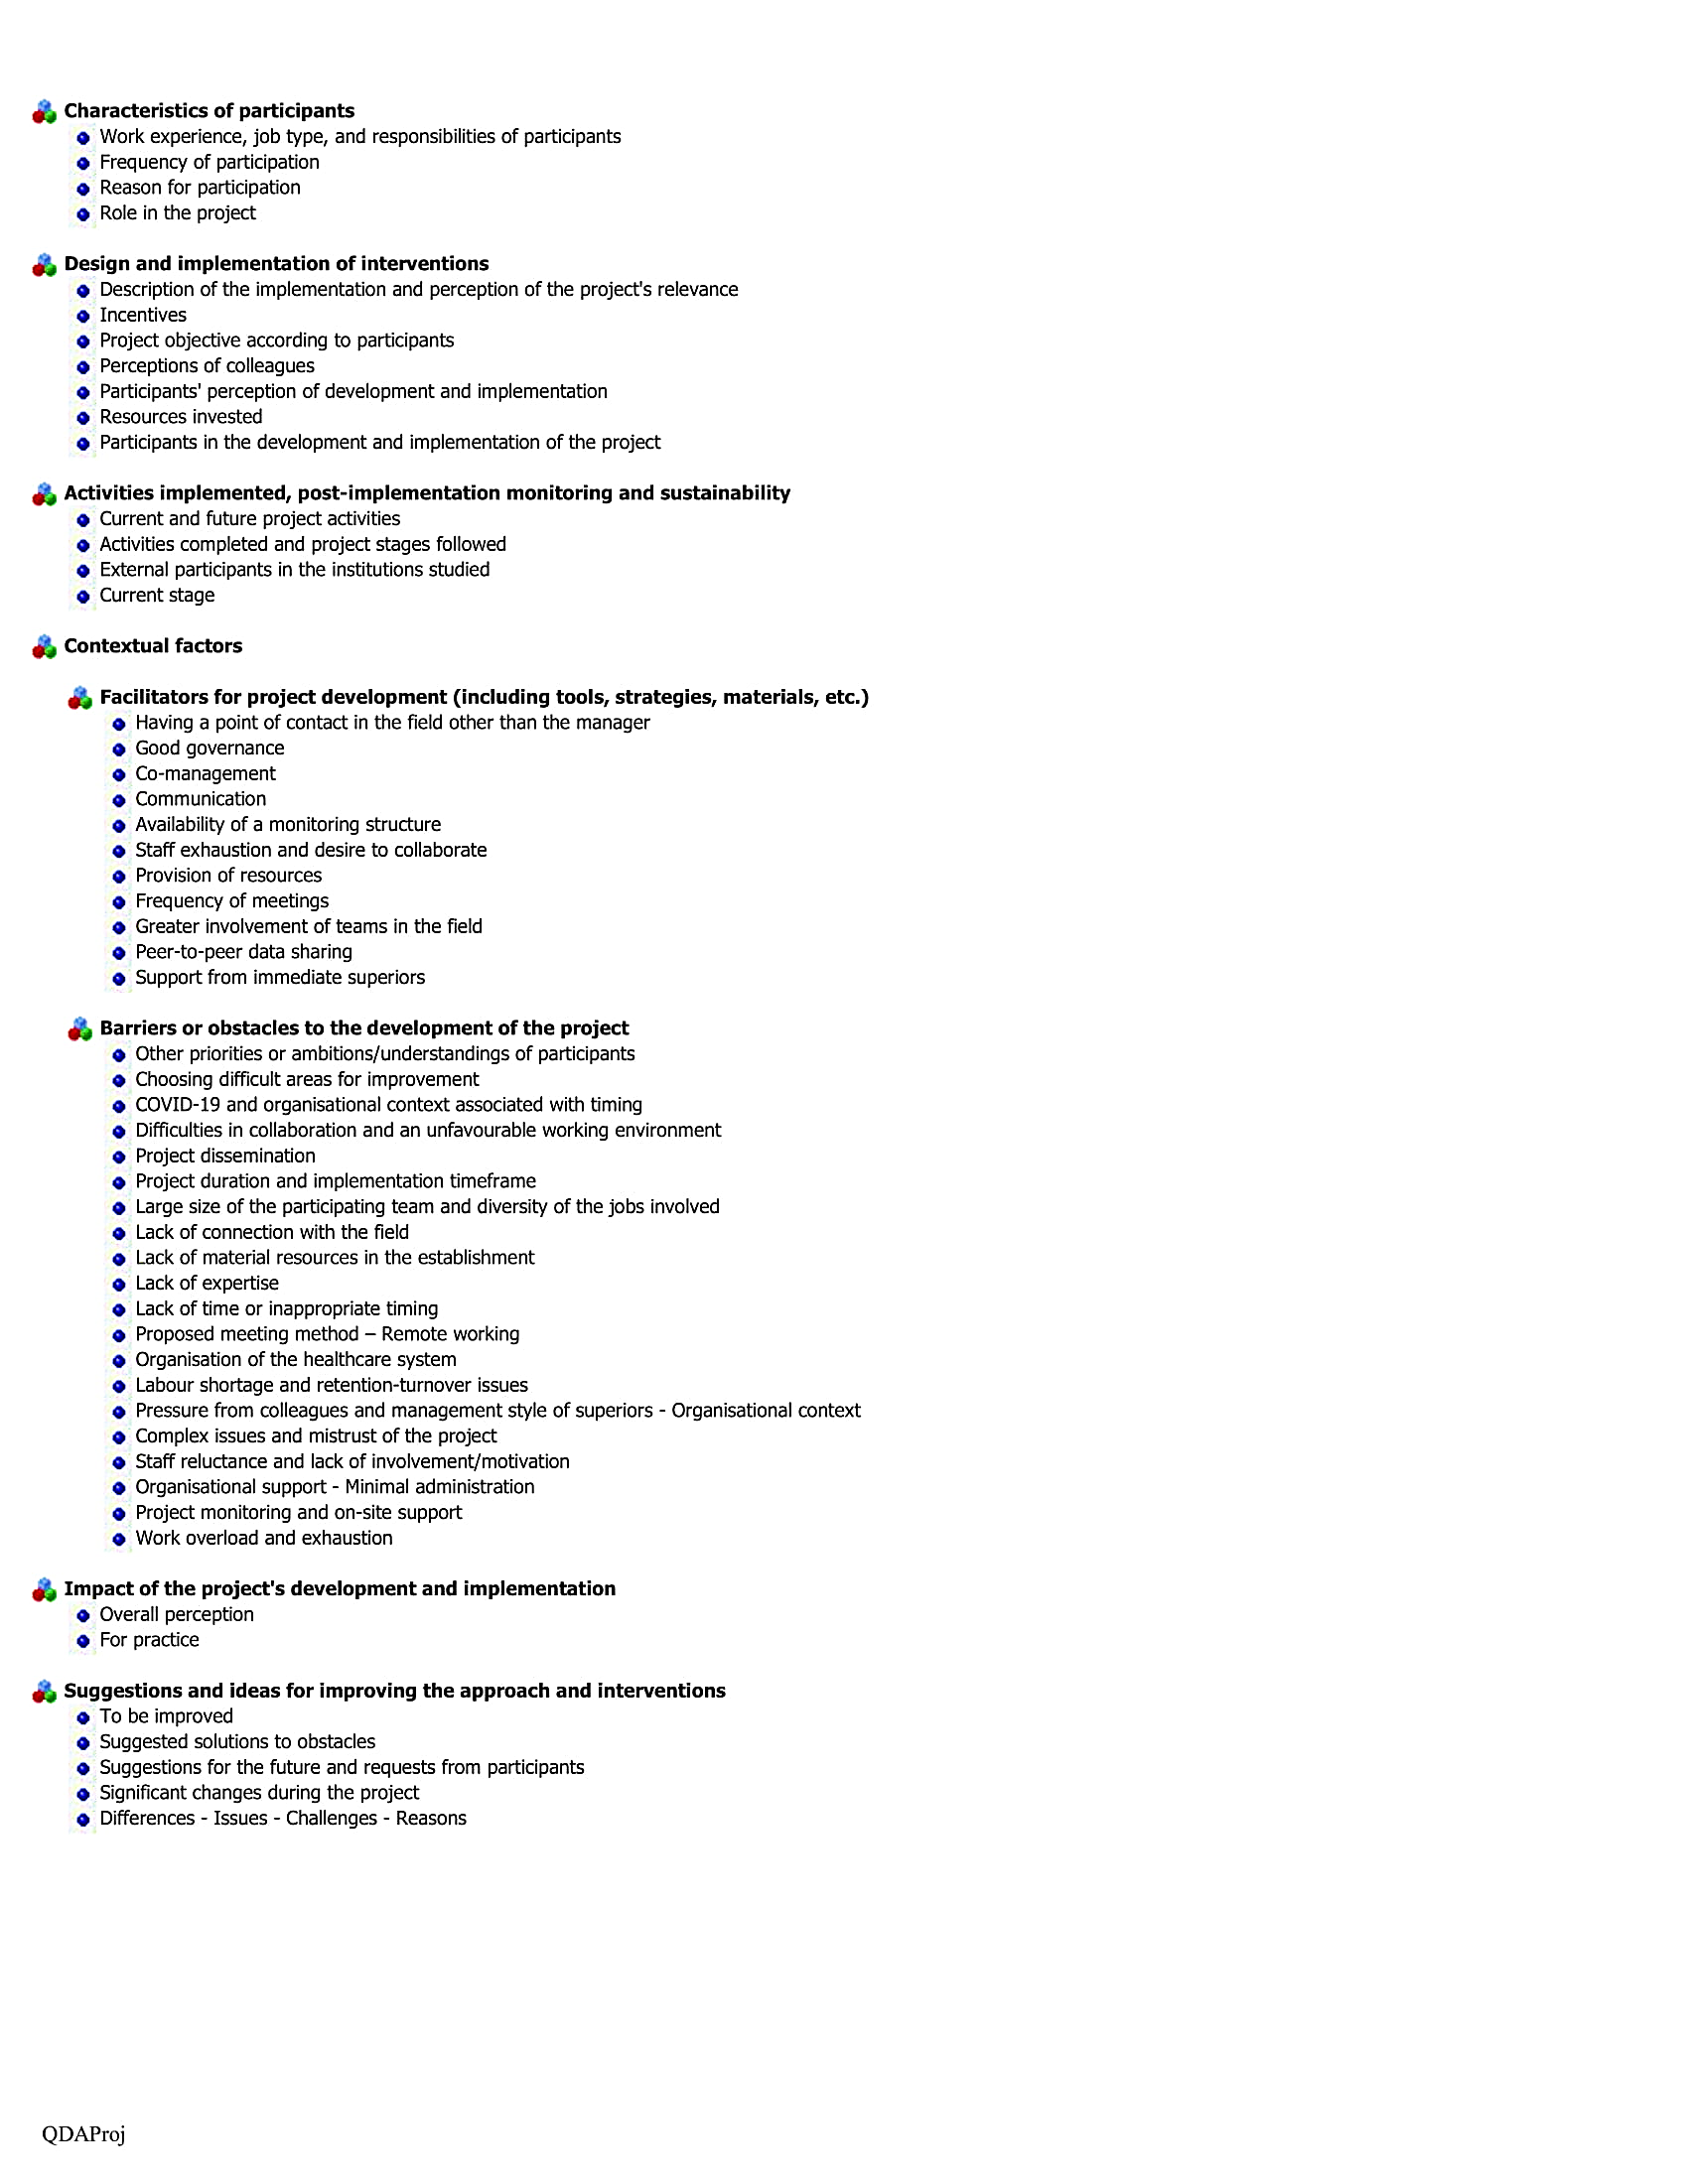

Supplement: Supplementary file 1 [file 00cf2250ddfe4c4e4de6be95.docx]

## Supplementary material 1: Interview guide


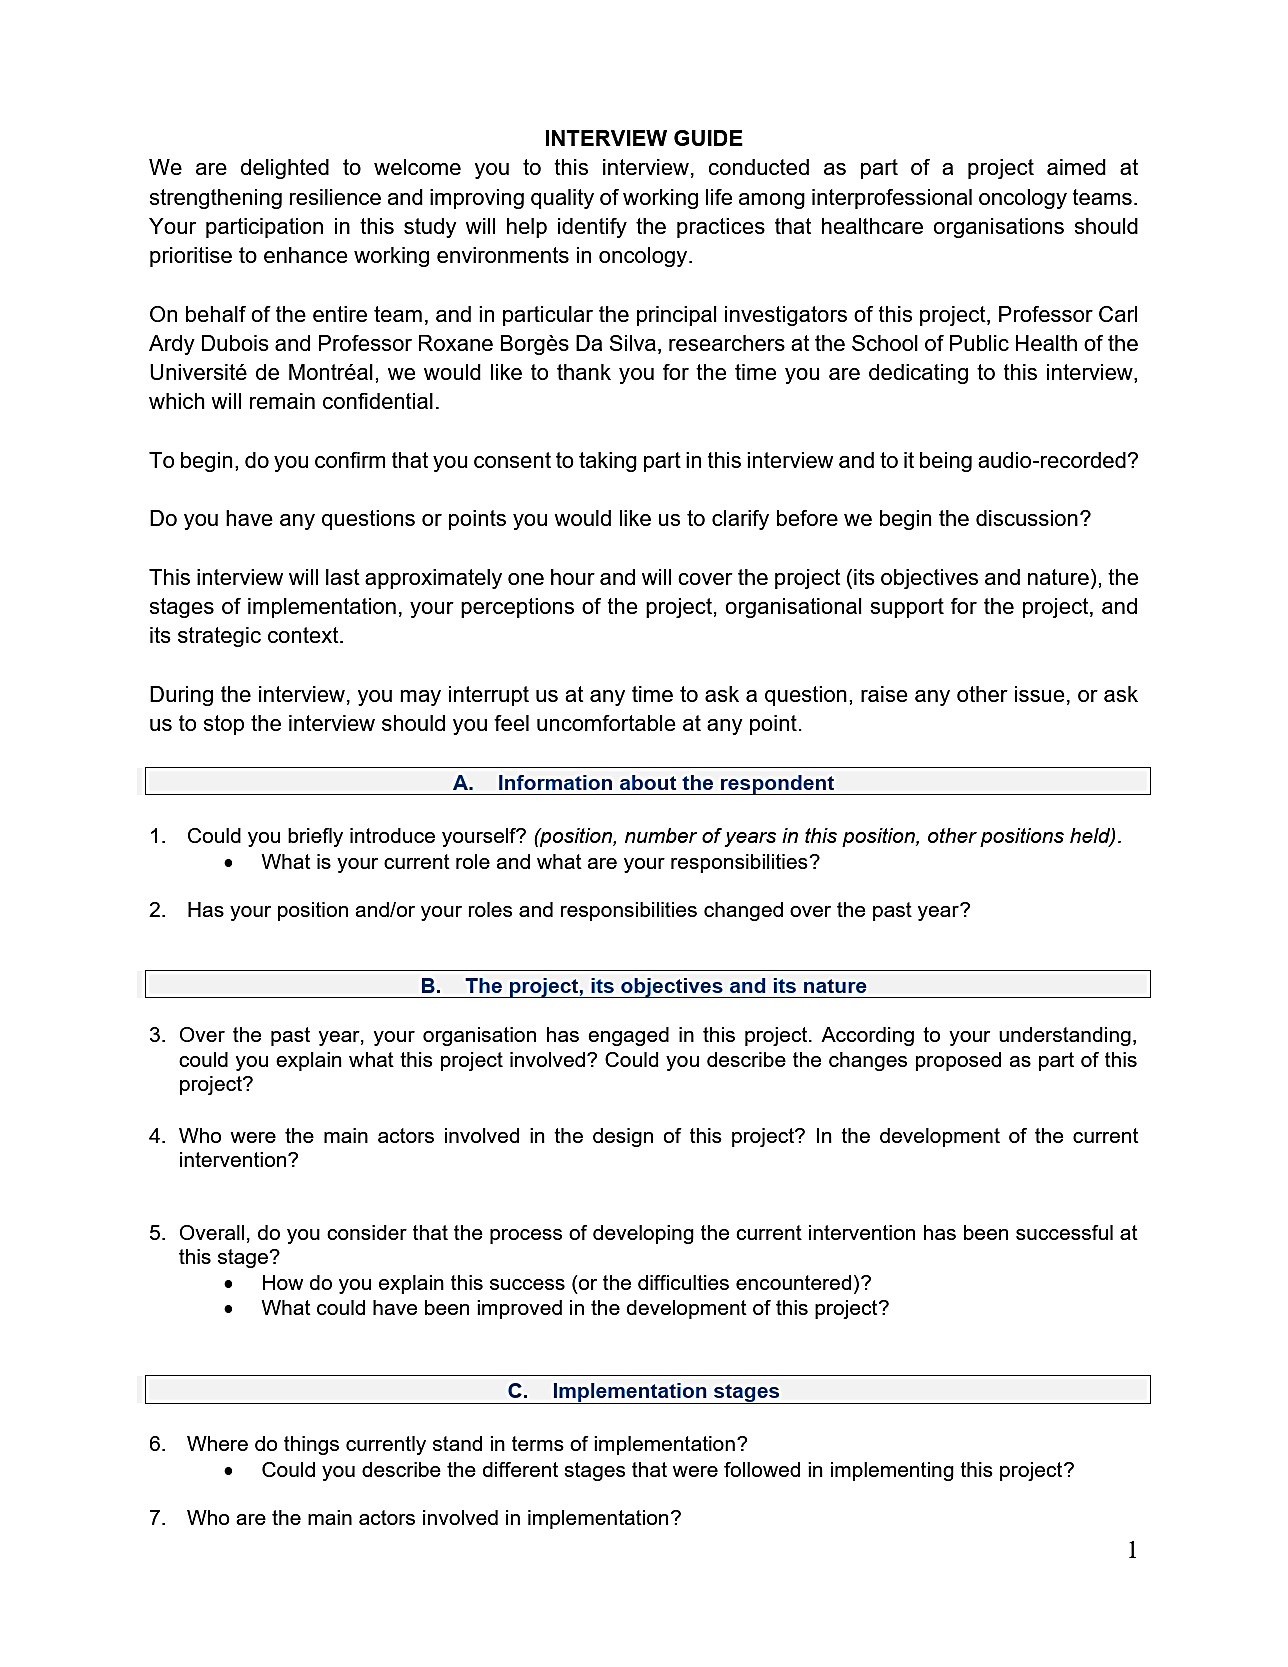


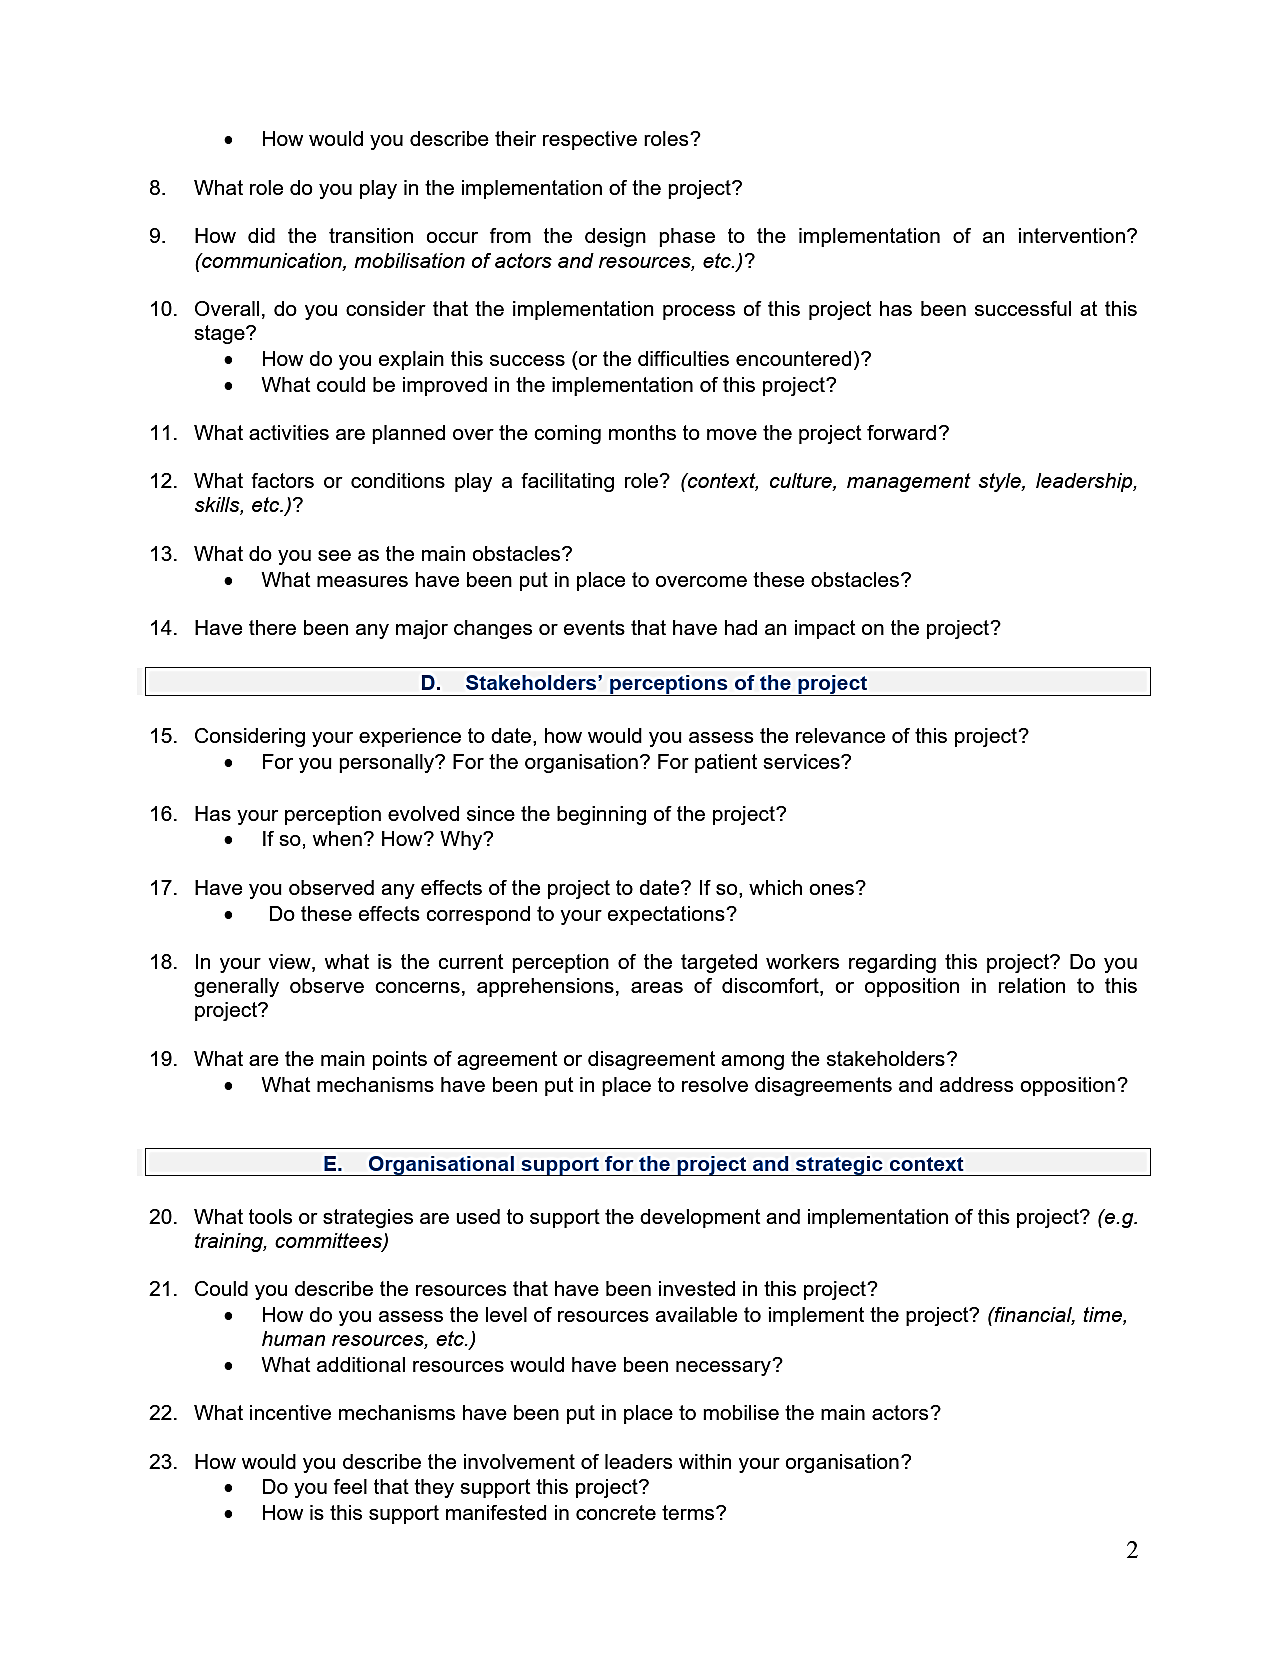

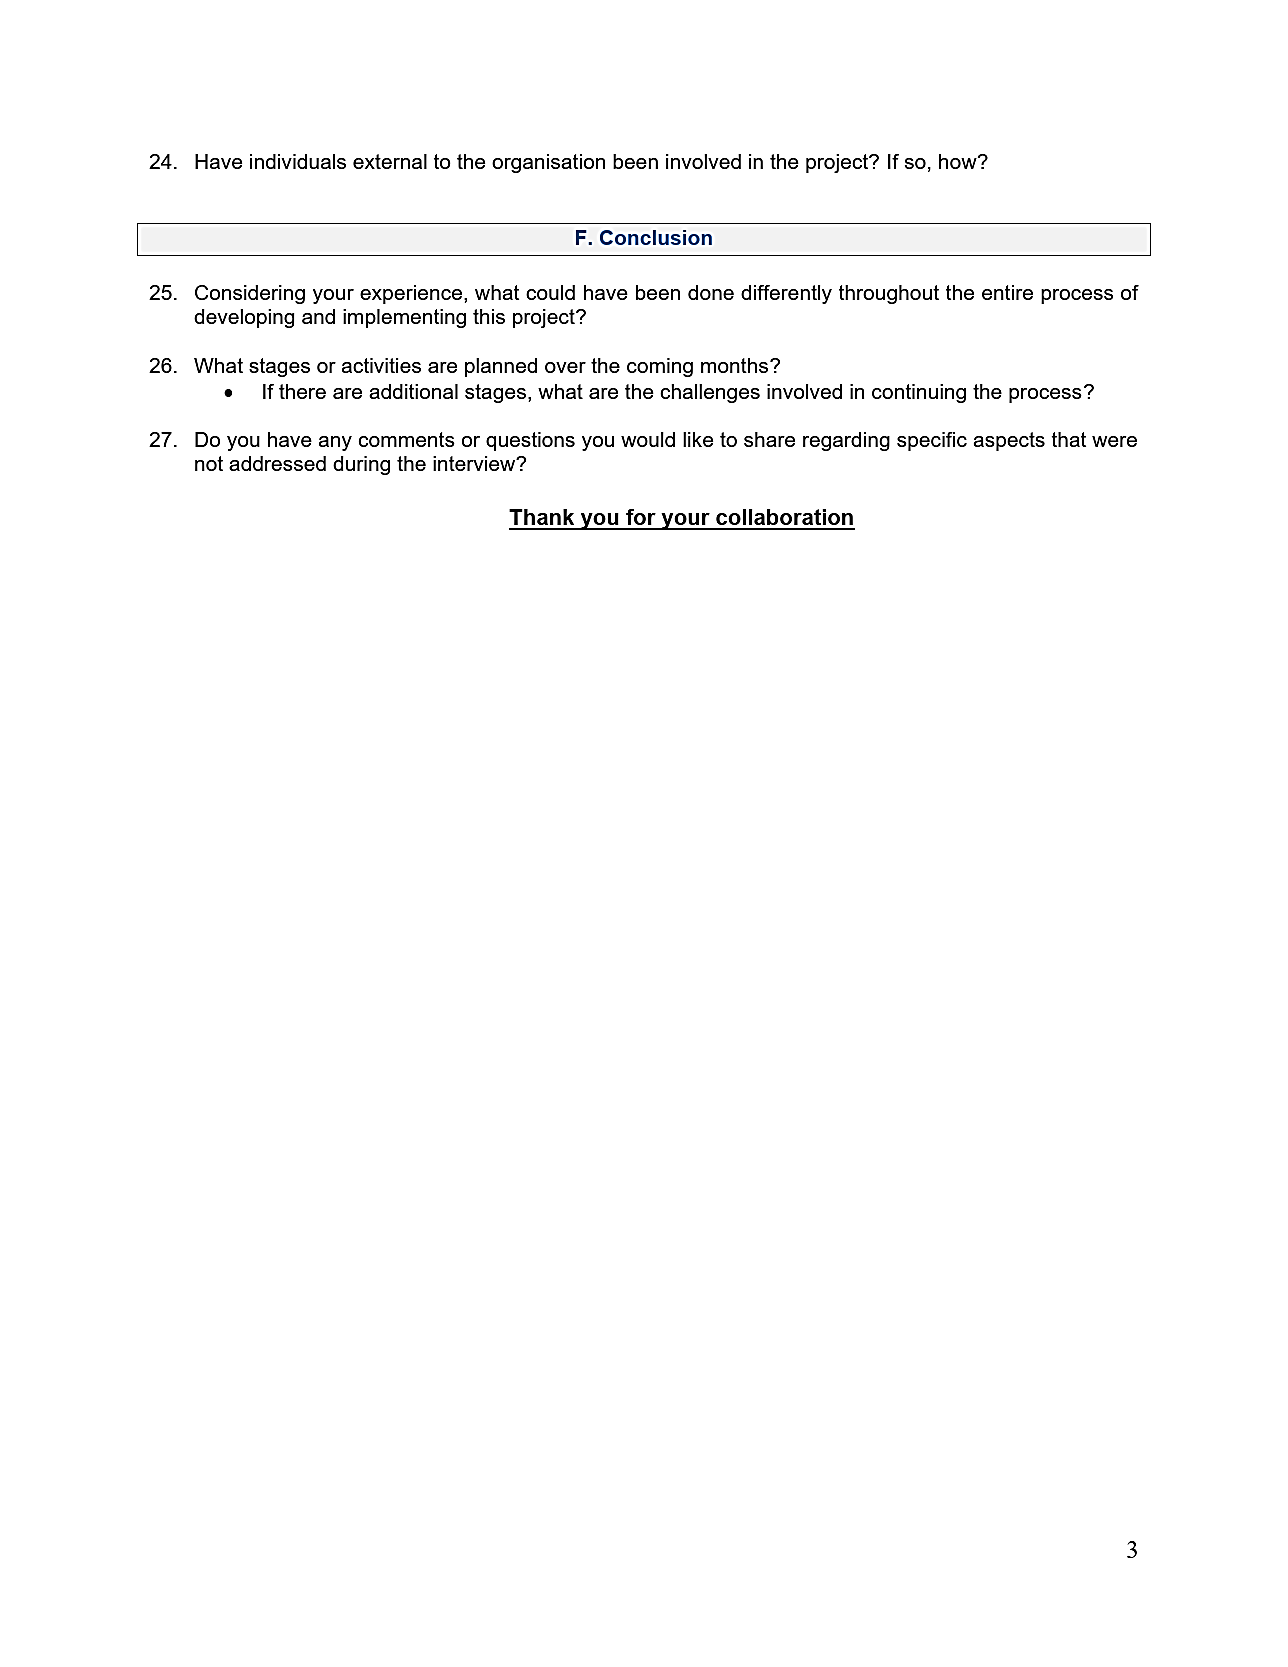

Supplement: Supplementary file 2 [file 80cd82eac194c49f3bbe7726.docx]
